# Supplementary material for: Bridging the Gap: Exploring Mentoring Needs of Overseas Qualified Dentists: A Qualitative Study
Source: Research Square preprint supplement (doi:10.21203/rs.3.rs-8329541/v1), 2025-12-18
Supplement: Supplementary file 1 [file 80c0f91ba16b51d5982e7840.docx]

**Naik Wassif**

**References**

1. Montreal, 1988. CEGEP
2. Holt, V.P. and Ladwa, R. (2009) ‘Mentoring. A quality assurance tool for dentists part : The roots of the modern approach to mentoring and coaching’, *Primary Dental Care*, os16(4), pp. 157–163. doi:10.1308/135576109789389469.
3. Brooks, J. and Hughes, C.H. (2021) *Practical applications of coaching and mentoring in Dentistry*. Chichester, West Sussex: Wiley Blackwell.
4. CIPD (2023) *Coaching and Mentoring*, *CIPD*. Available at: <https://www.cipd.org/uk/knowledge/factsheets/coaching-mentoring-factsheet/> (Accessed: 28 November 2023).
5. BDA (2023b) *NHS dentistry isn’t working: PM pressed to act on access crisis at conference*, *Nature News*. Available at: <https://www.nature.com/articles/s41415-023-6469-2> (Accessed: 28 November 2023).

6- Leigh, J. (2024) ‘Boosting retention in dentistry: The Power of Effective Coaching’, *BDJ In Practice*, 37(4), pp. 112–113. doi:10.1038/s41404-024-2674-1.

7- Saw, M. and Brooks, J. (2023) ‘The mentoring experience’, *BDJ In Practice*, 36(2), pp. 20–22. doi:10.1038/s41404-023-1874-4.

8- Atwal, A., McKay, E. and Sriram, V. (2023) *Understanding the difference, makes the difference: Perceptions of black and minoritised ethnic occupational therapists on mentoring - BMC health services research*, *BioMed Central*. Available at: [https://bmchealthservres.biomedcentral.com/articles/10.1186/s12913-023-10012-w#:~:text=It%20was%20perceived%20that%20understanding,don’t%20look%20the%20same](https://bmchealthservres.biomedcentral.com/articles/10.1186/s12913-023-10012-w#:~:text=It%20was%20perceived%20that%20understanding,don%E2%80%99t%20look%20the%20same). (Accessed: 28 November 2023).

9- Jeffrey, D. (2014) *Medical mentoring: Supporting students, doctors in training and General Practitioners*. London: Royal College of General Practitioners.

10- Brooks, J. (2018) ‘Let’s get serious about mentoring’, *British Dental Journal*, 224(2), pp. 72–72. doi:10.1038/sj.bdj.2018.39.

11- Burgess, A., Diggele, C. van and Mellis, C. (2018) ‘Mentorship in the healthprofessions: a review’, *THE CLINICAL TEACHER* , 15(3), pp. 185–274. Available at: <https://doi.org/10.1111/tct.12756> (Accessed: 07 January 2024).

12- Nathwani, S. and Rahman, N. (2022) ‘Growing in dentistry: Mentoring  the dental professional’, *BDJ Team*, 9(8), pp. 20–26. doi:10.1038/s41407-022-1602-7.

13- Alzahrani, A. *et al.* (2023) *Causes of stress and poor wellbeing among paramedic students in Saudi Arabia and the United Kingdom: A cross-cultural qualitative study*, *BMC health services research*. Available at: <https://pubmed.ncbi.nlm.nih.gov/37147658/> (Accessed: 28 November 2023).

14- Wieland, L., Ayton, J. and Abernethy, G. (2021) ‘Retention of general practitioners in remote areas of Canada and Australia: A meta‐aggregation of qualitative research’, *Australian Journal of Rural Health*, 29(5), pp. 656–669. doi:10.1111/ajr.12762.

15- Hayer, N. and Wassif, H.S. (2019) ‘A lonely business: Reflections on the wellbeing and morale of Dental teams’, *British Dental Journal*, 226(8), pp. 559–561. doi:10.1038/s41415-019-0205-y.

16- GDC (2023a) *Annual report and accounts 2022 - General Dental Council*, *General Dental Council*. Available at: <https://www.gdc-uk.org/docs/default-source/annual-reports/5039_gdc_annual-report-22-23_v6_accessible.pdf?sfvrsn=7b6ee943_5> (Accessed: 28 November 2023).

17- Ashiti, S. (2022) *Nearly two years without the Overseas Registration Exam: What’s next for internationally qualified dentists in the UK?*, *Nature News*. Available at: <https://www.nature.com/articles/s41415-022-4001-8> (Accessed: 28 November 2023).

18- GDC (2023b) *GDC welcomes new flexible legislation for international registration*, *GDC*. Available at: <https://www.gdc-uk.org/news-blogs/news/detail/2023/02/16/gdc-welcomes-new-flexible-legislation-for-international-registration> (Accessed: 28 November 2023).

19- GDC (2023c) *General Dental Council triples the number of places for part 1 of the overseas registration exam*, *General Dental Council*. Available at: <https://www.gdc-uk.org/news-blogs/news/detail/2023/05/16/gdc-triples-the-number-of-places-for-part-1-of-the-overseas-registration-exam> (Accessed: 28 November 2023).

20- BDA (2024) *Overseas dentists working in the UK*, *British Dental Assocation*. Available at: <https://www.bda.org/advice/career-hub/career-advice/overseas-dentists-working-in-the-uk/> (Accessed: 18 June 2024).

21- GDC (2023f) *The GDC welcomes the news that European dental qualifications will continue to be recognised in the UK for the next five years*, *General Dental Council*. Available at: [https://www.gdc-uk.org/news-blogs/news/detail/2023/06/29/the-gdc-welcomes-the-news-that-european-dental-qualifications-will-continue-to-be-recognised-in-the-uk-for-the-next-five-years#:~:text=We%20welcome%20today’s%20announcement%20from,further%20period%20of%20five%20years](https://www.gdc-uk.org/news-blogs/news/detail/2023/06/29/the-gdc-welcomes-the-news-that-european-dental-qualifications-will-continue-to-be-recognised-in-the-uk-for-the-next-five-years#:~:text=We%20welcome%20today%E2%80%99s%20announcement%20from,further%20period%20of%20five%20years). (Accessed: 18 June 2024).

22- Royal College of Surgeons of England (2024) *Information for overseas-qualified dentists*, *Royal College of Surgeons of England* . Available at: <https://www.rcseng.ac.uk/dental-faculties/fds/nacpde/overseas-qualified-dentists/#:~:text=Overseas%2Dqualified%20dentists%20are%20defined,must%20fulfil%20certain%20essential%20requirements>. (Accessed: 05 December 2023).

23- Al-Haddad, M. (2024) ‘European International Medical Graduates (imgs): Are we ignoring their needs and under-representing the scale of IMG issues in the UK?’, *Journal of the Royal Society of Medicine*, 117(2), pp. 52–54. doi:10.1177/01410768241230804.

24- Davda, L.S., Gallagher, J.E. and Radford, D.R. (2018) ‘Migration motives and integration of international human resources of health in the United Kingdom: Systematic review and meta-synthesis of qualitative studies using framework analysis’, *Human Resources for Health*, 16(1). doi:10.1186/s12960-018-0293-9.

25- Balasubramanian, M. *et al.* (2016) ‘The life story experience of “migrant dentists” in Australia: Potential implications for health workforce governance and international cooperation’, *International Journal of Health Policy and Management*, 6(6), pp. 317–326. doi:10.15171/ijhpm.2016.135.

26- Chen, P.G.-C. *et al.* (2011) ‘Professional challenges of Non-U.S.-Born international medical graduates and recommendations for support during residency training’, *Academic Medicine*, 86(11), pp. 1383–1388. doi:10.1097/acm.0b013e31823035e1.

27- Bayuo, J. *et al.* (2023) ‘A meta-synthesis of the transitioning experiences and career progression of migrant African nurses’, *BMC Nursing*, 22(1). doi:10.1186/s12912-023-01273-1.

28- Ohr, S.O. *et al.* (2013) ‘Organizational support in the recruitment and transition of overseas‐qualified nurses: Lessons learnt from a study tour’, *Nursing &amp; Health Sciences*, 16(2), pp. 255–261. doi:10.1111/nhs.12085.  Olmo-Extremera, M. *et al.* (2023) ‘Visual tools for supporting interviews in qualitative research: New approaches’, *Qualitative Research Journal* [Preprint]. doi:10.1108/qrj-07-2023-0113.

29- Whelan, G.P. (2006) ‘Commentary: Coming to America: The integration of international medical graduates into the American Medical Culture’, *Academic Medicine*, 81(2), pp. 176–178. doi:10.1097/00001888-200602000-00017.

30- Yuan, J.C.-C. *et al.* (2022) ‘Foreign-trained dentist vs. International Medical Graduate: What can we learn from international medical graduate literature?’, *Education Sciences*, 12(9), p. 631. doi:10.3390/educsci12090631.

31- West, E. and Nayar, S. (2016) *A review of the literature on the experiences of black, minority and ...*, *University of Greenwich*. Available at: <https://www.nmc.org.uk/globalassets/sitedocuments/other-publications/literature-review.pdf> (Accessed: 05 December 2023).

32- Bryce, M. *et al.* (2023) *Unlocking the potential of GDC Fitness to Practise data*, *GDC*. Available at: <https://www.gdc-uk.org/docs/default-source/research/unlocking-potential-of-gdc-fitness-to-practise-data-december-2023.pdf?sfvrsn=23b98dde_1> (Accessed: 02 January 2024).

33- GDC (2024) *General Dental Council Fitness to Practise Statistical Report 2023*, *General Dental Council*. Available at: <https://www.gdc-uk.org/about-us/our-organisation/reports> (Accessed: 13 July 2024).

34- Ghosh, M. and Chatterjee, S. (2021) ‘Aspirations of unemployed international medical graduates in the UK’, *Sushruta Journal of Health Policy &amp; Opinion*, 14(2), pp. 1–8. doi:10.38192/14.2.2.

35- Hanna, A. and Hanna, L.-A. (2019) ‘Topic analysis of UK Fitness to practise cases: What lessons can be learnt?’, *Pharmacy*, 7(3), p. 130. doi:10.3390/pharmacy7030130.

36- Humphrey, C., Hickman, S. and Gulliford, M.C. (2011) ‘Place of medical qualification and outcomes of UK General Medical Council “Fitness to practise” Process: Cohort study’, *BMJ*, 342(apr05 1), pp. d1817–d1817. doi:10.1136/bmj.d1817.

37- Zahra, D. *et al.* (2017) *Analysis of fitness to practise case data for the General Dental Council*. Available at: <https://www.gdc-uk.org/docs/default-source/research/ftp-data-analysis-detailed-report.pdf?sfvrsn=282ff980_2> (Accessed: 28 November 2023).

38- BDJ in Practice (2024) ‘Provisional registration ‘would require a stronger supervision plan’’, *BDJ In Practice*, 37(6), pp. 190–190. doi:10.1038/s41404-024-2762-2.

39- Davda, L.S. *et al.* (2022) *Accreditation and professional integration experiences of internationally qualified dentists working in the United Kingdom - Human Resources for Health*, *BioMed Central*. Available at: <https://human-resources-health.biomedcentral.com/articles/10.1186/s12960-021-00703-y> (Accessed: 05 December 2023).

40- Silverman, D. (2011) *Interpreting qualitative data A Guide to the Principles of Qualitative Research*. Sage.

41- Seale, C. *et al.* (2007) *Qualitative research practice*. London.

42- Ritchie, J. *et al.* (2014) *Qualitative Research Practice: A guide for social science students and researchers*. London: SAGE Publications Ltd.

43- Holloway, I. and Wheeler, S. (2010).Qualitative Research in Nursing and Healthcare. 3rd ed.Chichester, West Sussex: Wiley-Blackwell.

44- Kvale, S. and Brinkman, S. (2009) Interviews – Learning the Craft of Qualitative Research Interviewing, London: Sage.

45- Zakher, M. and Wassif, H. S.(2021) The use of objects to enhance online social research interviews. In Kara, H. and Khoo, S. M. (eds.) *Qualitative and Digital Research in Times of Crisis:* *Methods, Reflexivity and Ethics:* University of Bristol: Policy Press.

46- Braun, V. and Clarke, V. (2006) ‘Using thematic analysis in psychology’, *Qualitative Research in Psychology*, 3(2), pp. 77–101. doi:10.1191/1478088706qp063oa.

47- Henry-Noel, N. *et al.* (2018) ‘Mentorship in medicine and other Health Professions’, *Journal of Cancer Education*, 34(4), pp. 629–637. doi:10.1007/s13187-018-1360-6.

48- Campinha-Bacote (2022) *The process of cultural competence in the delivery of healthcare services*, *Transcultural C.A.R.E Associates*. Available at: <https://transculturalcare.net/the-process-of-cultural-competence-in-the-delivery-of-healthcare-services/> (Accessed: 27 February 2024).

49- Mikkonen, K. *et al.* (2016) ‘Mentor experiences of international healthcare students’ learning in a clinical environment: A systematic review’, *Nurse Education Today*, 40, pp. 87–94. doi:10.1016/j.nedt.2016.02.013.

50- Udod, S. and Racine, L. (2018) ‘Diversity in Health Care Organizations’, in *in Wagner,J..Leadership and Influencing Change in Nursing* . Regina: University of Regina Press, pp. 26–46.

51- Pressley, C. *et al.* (2022) ‘Global migration and factors that support acculturation and retention of International Nurses: A Systematic Review’, *International Journal of Nursing Studies Advances*, 4, p. 100083. doi:10.1016/j.ijnsa.2022.100083.

52- Mina, M.C. (2022) *The Lived Experience of Trainees and Supervisors regarding Mentoring in UK Postgraduate Medical Training: A descriptive phenomenological approach*, *University of Nottingham* . Available at: <https://rdmc.nottingham.ac.uk/handle/internal/9555> (Accessed: 02 February 2024).

53- Safari, K., McKenna, L. and Davis, J. (2022) ‘Transition experiences of internationally qualified health care professionals: A narrative scoping review’, *International Journal of Nursing Studies*, 129, p. 104221. doi:10.1016/j.ijnurstu.2022.104221.

54- Hulton, L.J. *et al.* (2016) ‘An evidence-based Nursing Faculty Mentoring Program’, *International Journal of Nursing Education*, 8(1), p. 41. doi:10.5958/0974-

9357.2016.00008.8.

55- Taylor, C.A. and Dancer, J.M. (2007) *Dentistry is different: Practitioner perceptions of the business ...* Available at: <https://www.researchgate.net/publication/233631581_Dentistry_is_different_Practitioner_perceptions_of_the_business_of_dentistry> (Accessed: 09 July 2024).

56- Wilson, G. *et al.* (2017) ‘Exploring the relationship between mentoring and doctors’ Health and Wellbeing: A narrative review’, *Journal of the Royal Society of Medicine*, 110(5), pp. 188–197. doi:10.1177/0141076817700848.

57- Levett-Jones, T. and Lathlean, J. (2009) ‘“don’t rock the boat”: Nursing students’ experiences of conformity and compliance’, *Nurse Education Today*, 29(3), pp. 342–349. doi:10.1016/j.nedt.2008.10.009.

58- Allan, H. (2010) ‘Mentoring Overseas Nurses: Barriers to effective and non-discriminatory mentoring practices’, *Nursing Ethics*, 17(5), pp. 603–613. doi:10.1177/0969733010368747.

59- Levett-Jones, T. *et al.* (2007) ‘Belongingness: A critique of the concept and implications for nursing education’, *Nurse Education Today*, 27(3), pp. 210–218. doi:10.1016/j.nedt.2006.05.001.

60- Vinales, J.J. (2015) ‘The mentor as a role model and the importance of belongingness’, *British Journal of Nursing*, 24(10), pp. 532–535. doi:10.12968/bjon.2015.24.10.532.

61- Narasimhan , P. and Melarkode, K. (2021) ‘Training for anaesthetists in a new healthcare system: pathway to learning & development ’, *British Journal of Medical Practitioners*, 14(1). doi:https://www.bjmp.org/content/training-anaesthetists-new-healthcare-system-pathway-learning-development.

62- Smith, C. and Cantillon, P. (2024) ‘Exemplar or facilitator: An exploration of the lived experience of nurse mentors supporting the adaptation of internationally educated nurses’, *The Clinical Teacher*, 21(2). doi:10.1111/tct.13702.

63- Lanada, J.A. and Culligan, K. (2024) ‘The experiences of internationally educated nurses who joined the nursing workforce in England’, *Practice Nursing*, 35(3), pp. 92–98. doi:10.12968/pnur.2024.35.3.92.

64- GDC (2022) *Experiences of GDC Fitness to practise participants 2015 – 2021: A realist study*, *General Dental Council*. Available at: <https://www.gdc-uk.org/about-us/what-we-do/research/our-research-library/detail/report/experiences-of-gdc-fitness-to-practise-participants-2015-2021-a-realist-study> (Accessed: 20 June 2023).

65- Dental Protection (2018) *Dental Protection Survey reveals 9 in 10 dentists fear being sued by patients*, *Dental Protection*. Available at: <https://www.dentalprotection.org/uk/articles/dental-protection-survey-reveals-9-in-10-dentists-fear-being-sued-by-patients> (Accessed: 20 June 2023).

66- Dental Protection (2016) *Handling complaints*, *Dental Protection* . Available at: <https://www.dentalprotection.org/docs/dentalprotectioninternationallibraries/dental-advice-booklets/dental-advice-booklet-complaints-handling-england.pdf> (Accessed: 12 July 2024).

67- Pincock, S. (2004) ‘Poor communication lies at Heart of NHS Complaints, says ombudsman’, *BMJ*, 328(7430). doi:10.1136/bmj.328.7430.10-d.

68- Gov.UK (2024) *Provisional registration for overseas-qualified dentists*, *GOV.UK*. Available at: <https://www.gov.uk/government/consultations/provisional-registration-for-overseas-qualified-dentists/provisional-registration-for-overseas-qualified-dentists> (Accessed: 17 June 2024).

69- Holden, A. (2018) ‘Consumer-driven and commercialised practice in Dentistry: An ethical and professional problem?’, *British Dental Journal*, 224(9), pp. 707–707. doi:10.1038/sj.bdj.2018.385.

70- Jenkins, S.M. *et al.* (2019) ‘What did they do next? A survey of dentists who have passed the Overseas Registration Examination of the General Dental Council’, *British Dental Journal*, 226(5), pp. 342–348. doi:10.1038/s41415-019-0032-1.

71- BDA (2022) *Lack of reform: Nearly 1/2 dentists severing ties with NHS*, *British Dental Assocation*. Available at: <https://www.bda.org/media-centre/nearly-half-of-dentists-severing-ties-with-nhs-as-government-fails-to-move-forward-on-reform/> (Accessed: 10 July 2024).

72- Evans, D. *et al.* (2023) ‘The dental workforce recruitment and retention crisis in the UK’, *British Dental Journal*, 234(8), pp. 573–577. doi:10.1038/s41415-023-5737-5.

73- Yhnell, M.H. and R. (2024) *NHS dental budget: More than £25m going unspent*, *BBC News*. Available at: <https://www.bbc.co.uk/news/uk-england-somerset-68413931> (Accessed: 10 July 2024).

74- BDA (2023a) ‘Exodus from NHS dentistry reaches New Heights’, *British Dental Journal*, 234(12), pp. 855–856. doi:10.1038/s41415-023-6048-6.

75- Calnan, M. *et al.* (2000) ‘Doing business in the NHS: Exploring dentists’ decisions to practise in the public and private sectors’, *Sociology of Health &amp; Illness*, 22(6), pp. 742–764. doi:10.1111/1467-9566.00229.

76- Vaish, A., Grossmann, T. and Woodward, A. (2008) ‘Not all emotions are created equal: The negativity bias in social-emotional development.’, *Psychological Bulletin*, 134(3), pp. 383–403. doi:10.1037/0033-2909.134.3.383.

77- Katta, A. (2019) *Trust is still one of the biggest barriers for communicating with refugees*, *UNHCR Innovation*. Available at: <https://www.unhcr.org/innovation/trust-is-still-one-of-the-biggest-barriers-for-communicating-with-refugees/> (Accessed: 11 July 2024).

78- Porter, L. *et al.* (no date) *How can social research give a voice to refugees?*, *SRA Home*. Available at: <https://the-sra.org.uk/SRA/Blog/Howcansocialresearchgiveavoicetorefugees.aspx> (Accessed: 11 July 2024).

79- Alexis, O., Vydelingum, V. and Robbins, I. (2007) ‘Engaging with a new reality: Experiences of overseas minority ethnic nurses in the NHS’, *Journal of Clinical Nursing*, 16(12), pp. 2221–2228. doi:10.1111/j.1365-2702.2007.02080.x.

80- Rashid, M. *et al.* (2023) ‘International Medical Graduates’ perceptions about residency training experience: A qualitative study’, *International Journal of Medical Education*, 14, pp. 4–10. doi:10.5116/ijme.63c3.e6b3.

81- NHS (2024b) *NHS choices*. Available at: <https://heeoe.hee.nhs.uk/dental/performers-list-validation-experience-plve> (Accessed: 14 July 2024).

82- Williams, M. (2022) ‘What are dental professionals’ perceptions of stress and its triggers in dentistry; is it perceived that mentoring could help?’, *BDJ Team*, 9(10), pp. 48–51. doi:10.1038/s41407-022-1684-2.

83- Dancer, J.M. (2003) ‘Mentoring in healthcare: theory in search of practice?’, *Clinician in Management*, pp. 21–31. Available at: [file:///C:/Users/cheta/Downloads/EBSCO-FullText-2024-07-07%20(1).pdf](file:///C:\Users\cheta\Downloads\EBSCO-FullText-2024-07-07%20(1).pdf) (Accessed: 07 July 2024).

84- Correa-Betancour, M. *et al.* (2024) ‘Barriers and facilitators to the professional integration of internationally qualified nurses in Australia: A mixed methods systematic review’, *Australian Journal of Advanced Nursing*, 41(1). doi:10.37464/2024.411.933.

85- Buchanan, J. *et al.* (2022) *Experiences of GDC Fitness to practise participants 2015 – 2021: A realist study*, *General Dental Council*. Available at: <https://www.gdc-uk.org/about-us/what-we-do/research/our-research-library/detail/report/experiences-of-gdc-fitness-to-practise-participants-2015-2021-a-realist-study> (Accessed: 13 July 2024).

86- Dental Mentors UK (2020) *Dental Mentors UK*. Available at: <https://dentalmentorsuk.com/index.php> (Accessed: 05 December 2023).
